# Supplementary material for: CHNO isomers and derivatives – a computational overview
Source: Royal Society of Chemistry journal article supplement (doi:10.1039/d1nj05752a), 2022-01-01
Supplement: d1nj05752a1.pdf [file d1nj05752a1.pdf]

## Electronic Supporting Information

# CHNO isomers and derivatives - A computational overview

Alicia Rey Planells<sup>a</sup> and Arturo Espinosa Ferao<sup>\*a</sup>

<sup>a</sup> Depto. Química Orgánica, Facultad de Química, Campus de Espinardo, Universidad de Murcia, 30100 Murcia (Spain), E-mail: artuesp@um.es.

### Table of contents

|                                                                                                                                                          |        |
|----------------------------------------------------------------------------------------------------------------------------------------------------------|--------|
| <u>Figure S1</u> : Homodesmotic (RC4) reactions used for the estimation of RSE for <b>1a</b> .                                                           | S2     |
| <u>Table S1</u> : Computed $\Delta E_{\text{ZPE}}$ for the interconversions among R(CNO) isomers.                                                        | S3     |
| <u>Figure S2</u> : Computed (DLPNO-CCSD(T)/def2-TZVPP) $\Delta E_{\text{ZPE}}$ profile for CHNO isomers.                                                 | S4     |
| <u>Figure S3</u> : Computed (DLPNO-CCSD(T)/def2-TZVPP) $\Delta E_{\text{ZPE}}$ for of CON <sup>-</sup> isomers.                                          | S4     |
| <u>Figure S4</u> : Computed (B3LYP-D3/def2-TZVP) spin density isosurfaces for <b>6a<sup>t</sup></b> , <b>12a<sup>t</sup></b> and <b>19<sup>t</sup></b> . | S5     |
| <u>Calculated structures</u> . Cartesian coordinates and energies for all computed TS and minima.                                                        | S6-S29 |

## Estimation of RSE

As reported elsewhere,<sup>S1</sup> RSEs were calculated using homodesmotic reactions (reaction class 4 or "RC4"), which constitute the penultimate type in a hierarchy of increasingly accurate processes, due to the conservation of larger fragments, according to a recent classification and redefinition of reaction types used in thermochemistry.<sup>S2</sup> RSE were obtained as the average of the opposite energy (including the zero-point energy correction) for the three endocyclic bond cleavage reactions (Figure S1).

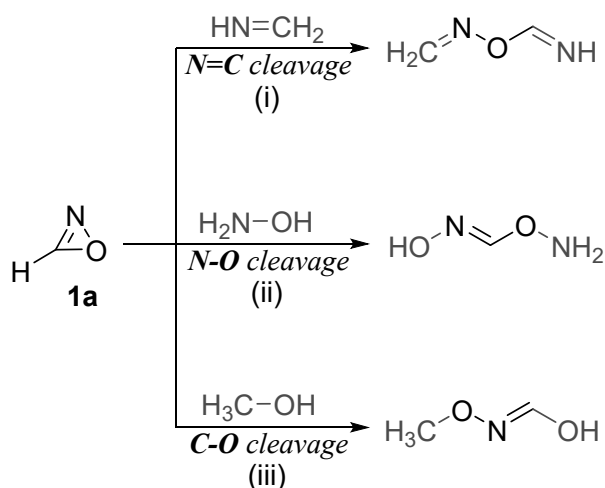

**Figure S1:** Homodesmotic (RC4)<sup>S2</sup> ring-opening reactions used for the estimation of RSE of **1a**.

<sup>S1</sup> A. Rey Planells and A. Espinosa Ferao, *Inorg. Chem.*, 2020, **59**, 11503–11513.

<sup>S2</sup> S. E. Wheeler, K. N. Houk, P. v. R. Schleyer, W. D. Allen., *J. Am. Chem. Soc.*, 2009, **131**, 2547-2560.

**Table S1:** Computed zero-point corrected energy data  $\Delta E_{\text{ZPE}}$  (kcal/mol) for the interconversions among CRNO isomers. Energies are referred to the respective oxazirine species (**1a-c**).

|                              | <b>(1a→2a)<sup>‡</sup></b>     | <b>2a</b>     | <b>(1a→3a)<sup>‡</sup></b>               | <b>3a</b>                                     | <b>(4a→3a)<sup>‡</sup></b> | <b>4a</b>                                  | <b>(3a→5a)<sup>‡</sup></b> | <b>(1a→5a)<sup>‡</sup></b> | <b>5a</b>                  | <b>(1a→6a)<sup>‡</sup></b> |
|------------------------------|--------------------------------|---------------|------------------------------------------|-----------------------------------------------|----------------------------|--------------------------------------------|----------------------------|----------------------------|----------------------------|----------------------------|
| DLPNO-CCSD(T)/def2-TZVPP     | 59.98                          | 19.09         | 51.82                                    | -4.05                                         | 21.82                      | 21.56                                      | 63.09                      | 51.92                      | -16.9                      | 21.13                      |
| CASSCF(6,6)/MRACPF/def2-TZVP | 62.06                          | 24.19         | 52.19                                    | 4.23                                          | 23.53                      | 25.13                                      | 62.07                      | 50.52                      | -12.12                     | 23.82                      |
|                              | <b>(2a→6a)<sup>‡</sup></b>     | <b>6a</b>     | <b>6a<sup>t</sup></b>                    | <b>(6a→7a)<sup>‡</sup></b>                    | <b>7a</b>                  | <b>(1a→8a)<sup>‡</sup></b>                 | <b>(2a→8a)<sup>‡</sup></b> | <b>8a</b>                  | <b>(2a→9a)<sup>‡</sup></b> | <b>9a</b>                  |
| DLPNO-CCSD(T)/def2-TZVPP     | 32.36                          | 86.27         | -2.37                                    | 3.78                                          | -62.46                     | 118.4                                      | 118.99                     | 78.35                      | 42.29                      | 46.75                      |
| CASSCF(6,6)/MRACPF/def2-TZVP | 26.97                          | 81.62         | -1.58                                    | 9.35                                          | -53.71                     | 102.63                                     | 103.05                     | 75.61                      | 51.9                       | 47.56                      |
|                              | <b>(9a→10a+11)<sup>‡</sup></b> | <b>10a+11</b> | <b>6a<sup>t</sup>-10a<sup>t</sup>+11</b> | <b>(9a→10a<sup>t</sup>+11)<sup>mecp</sup></b> | <b>10a<sup>t</sup>+11</b>  | <b>(1a→12a<sup>t</sup>)<sup>mecp</sup></b> | <b>12a<sup>t</sup></b>     | <b>12a<sup>s</sup></b>     | <b>2b</b>                  | <b>3b</b>                  |
| DLPNO-CCSD(T)/def2-TZVPP     | 39.33                          | 39.41         | 4.49                                     | 43.4                                          | -6.35                      | 9.74                                       | -3.64                      | 25.42                      | 31.99                      | 14.51                      |
| CASSCF(6,6)/MRACPF/def2-TZVP | 45.04                          | 36.15         | 9.34                                     | 48.52                                         | -2.57                      | 6.8                                        | -2.49                      | 1.85                       | 34.88                      | 19.84                      |
|                              | <b>4b</b>                      | <b>5b</b>     | <b>6b</b>                                | <b>7b</b>                                     | <b>8b</b>                  | <b>9b</b>                                  | <b>10b+11</b>              | <b>10b<sup>t</sup>+11</b>  | <b>12b<sup>t</sup></b>     | <b>2c</b>                  |
| DLPNO-CCSD(T)/def2-TZVPP     | 39.50                          | -10.15        | -67.18                                   | -41.79                                        | 87.48                      | -                                          | -50.86                     | 0.71                       | 0.06                       | 18.49                      |
| CASSCF(6,6)/MRACPF/def2-TZVP | 39.11                          | -6.68         | -64.25                                   | -36.16                                        | 81.02                      | -                                          | 38.03                      | -1.18                      | 0.96                       | 23.19                      |
|                              | <b>3c</b>                      | <b>4c</b>     | <b>5c</b>                                | <b>6c</b>                                     | <b>7c</b>                  | <b>8c</b>                                  | <b>9c</b>                  | <b>10c+11</b>              | <b>10c<sup>t</sup>+11</b>  | <b>12c<sup>t</sup></b>     |
| DLPNO-CCSD(T)/def2-TZVPP     | -3.62                          | -             | -14.06                                   | -86.70                                        | -60.38                     | 78.60                                      | -                          | 33.08                      | -9.14                      | -4.29                      |
| CASSCF(6,6)/MRACPF/def2-TZVP | 3.68                           | -             | -9.40                                    | -78.56                                        | -53.07                     | 73.06                                      | -                          | -17.91                     | -12.14                     | -5.53                      |

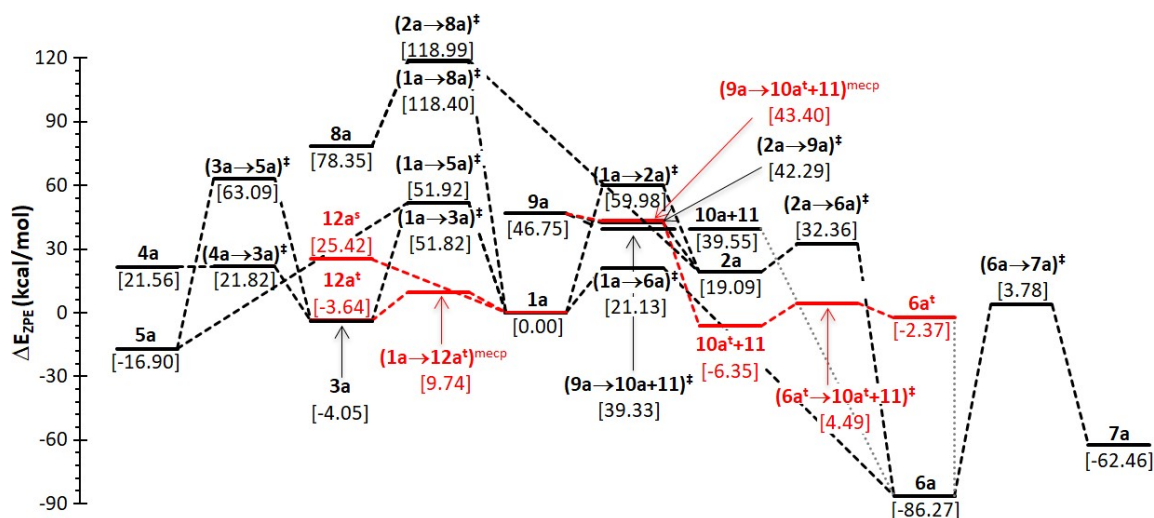

Figure S2: Computed (DLPNO-CCSD(T)/def2-TZVPP//B3LYP-D3/def2-TZVP) zero-point corrected energy profile for the interconversions among CHNO isomers. Red colour indicates open-shell species.

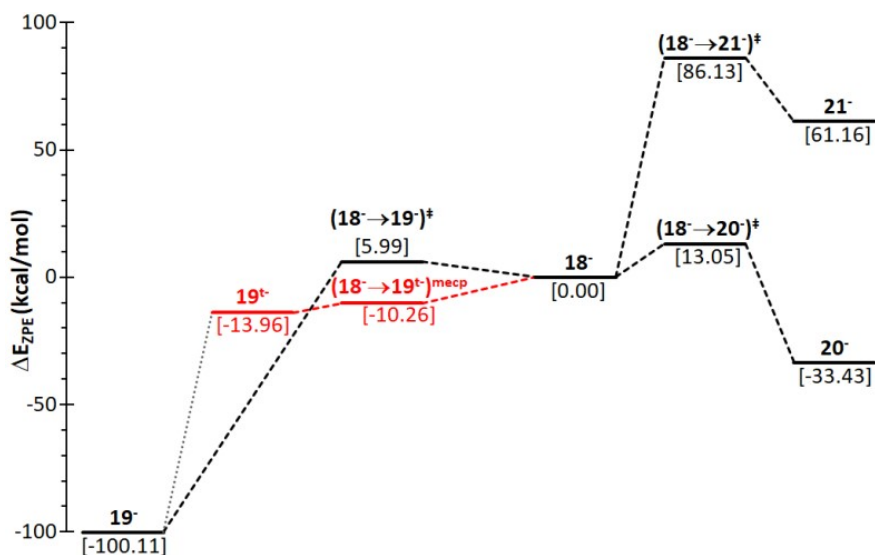

Figure S3: Computed (DLPNO-CCSD(T)/def2-TZVPP//B3LYP-D3/def2-TZVP) zero-point corrected energy profile for the interconversions of anionic CON<sup>-</sup> isomers. Red colour indicates open-shell species.

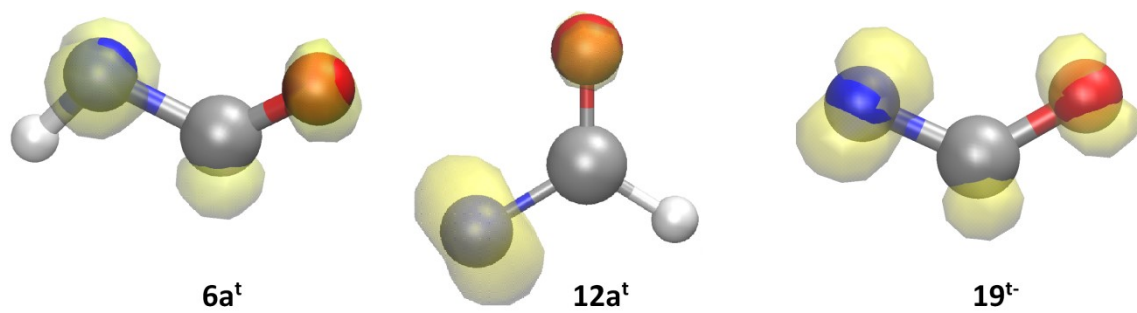

Figure S4: Computed (B3LYP-D3/def2-TZVP) spin density isosurface (0.04 au) for open-shell isomers **6a<sup>t</sup>**, **12a<sup>t</sup>** and **19<sup>t-</sup>**.

## Calculated structures

Cartesian coordinates (in Å), G correction (G-E) and ZPE (in hartrees) for TSs and minima were computed at B3LYP-D3/def2-TZVP. For TSs the imaginary frequency is given. In addition, unless otherwise indicated, electronic energies (in hartrees) are quoted using the default CASSCF(6,6)/MRACPF/def2-TZVP level and also collecting those at DLPNO-CCSD(T)/def2-TZVPP (indicated).

**1a** E = -168.3018986 au  
E = -168.2528671 au [CASSCF(6,6)/MRACPF/def2-TZVP(-F)]  
E = -168.0191660 au [CASSCF(6,6)/MRACPF/def2-SVPD]  
E = -168.2974765 au [DLPNO-CCSD(T)/def2-TZVPP]  
ZPE = 0.01988383 au  
G<sub>corr</sub> = -0.00388192 au

|   |                   |                  |                  |
|---|-------------------|------------------|------------------|
| C | -2.02132907862173 | 1.49351612486192 | 1.85440049228218 |
| H | -2.27454749888140 | 1.04136364949904 | 2.80775905445467 |
| O | -2.40376664848329 | 2.60230450267080 | 1.29039738249309 |
| N | -1.31097691401358 | 1.26876149296823 | 0.84993402077005 |

**(1a→2a)<sup>‡</sup>** E = -168.1972485 au  
E = -168.1961331 au [DLPNO-CCSD(T)/def2-TZVPP]  
ZPE = 0.014124723 au  
v = -1499.02 cm<sup>-1</sup>

|   |                   |                   |                   |
|---|-------------------|-------------------|-------------------|
| C | -0.22024716716685 | -0.53133700114497 | -0.30946756795982 |
| H | -0.74096950093380 | -0.09374265438072 | 0.74704421246170  |
| O | 1.10985194495611  | -0.13364350654646 | -0.26526756845896 |
| N | -0.14863527685546 | 0.75872316207215  | -0.17230907604292 |

**(1a→3a)<sup>‡</sup>** E = -168.2134519 au  
E = -168.2096129 au [DLPNO-CCSD(T)/def2-TZVPP]  
ZPE = 0.014603484 au  
v = -1278.88 cm<sup>-1</sup>

|   |                   |                   |                   |
|---|-------------------|-------------------|-------------------|
| C | 0.32856657726870  | 0.00936855375311  | 0.68164443227710  |
| H | 0.05521861710143  | 0.99250157299159  | 0.06436832010400  |
| O | -0.41720841382725 | 0.04273722004080  | -0.86792525612668 |
| N | 0.03342321945711  | -1.04460734678549 | 0.12191250374557  |

**(1a→5a)<sup>‡</sup>** E = -168.2174125 au  
E = -168.2107647 au [DLPNO-CCSD(T)/def2-TZVPP]

ZPE = 0.01590972 au

$v = -732.97 \text{ cm}^{-1}$

|   |                   |                  |                   |
|---|-------------------|------------------|-------------------|
| C | -0.55404295619236 | 4.33350434889466 | -1.75211282366991 |
| H | -0.56538765730607 | 3.24701798295892 | -1.82521392444690 |
| N | 0.18854340113155  | 5.09542594360871 | -2.42079433899123 |
| O | 1.23273379236687  | 5.25096381453747 | -1.63836399289185 |

**(1a→6a)<sup>‡</sup>** E = -168.2608490 au

E = -168.2607075 [DLPNO-CCSD(T)/def2-TZVPP]au

ZPE = 0.016792876 au

$v = -1267.55 \text{ cm}^{-1}$

|   |                   |                   |                   |
|---|-------------------|-------------------|-------------------|
| C | 0.05179852381090  | -0.02851980170491 | 0.00000125785736  |
| H | -0.54603160001739 | -0.99559235857389 | -0.00000040493317 |
| O | 1.28634367923438  | 0.09427621055871  | -0.00000046450087 |
| N | -0.79211060302789 | 0.92983594972009  | -0.00000038842332 |

**(1a→8a)<sup>‡</sup>** E = -168.1337424 au

E = -168.1041813 [DLPNO-CCSD(T)/def2-TZVPP]au

ZPE = 0.015274465 au

$v = -720.73 \text{ cm}^{-1}$

|   |                   |                   |                   |
|---|-------------------|-------------------|-------------------|
| C | -0.17001861599475 | -0.96481827091374 | -0.00494933601240 |
| H | -1.13917769640238 | -0.41013711313276 | 0.00275512461376  |
| O | 0.76624419326708  | 0.07818552451457  | 0.00529485383400  |
| N | 0.54295211913005  | 1.29676985953193  | -0.00310064243536 |

**(1a→12a<sup>†</sup>)<sup>mecp</sup>**

E = -168.2907485 au

E = -168.2816405 au [DLPNO-CCSD(T)/def2-TZVPP]

ZPE = 0.0195637 au

$G_{\text{corr}} = -0.02426711 \text{ au}$

|   |                   |                  |                   |
|---|-------------------|------------------|-------------------|
| C | -0.40767942735362 | 3.30672897631472 | -1.90912091710312 |
| H | 0.16255267405311  | 2.37578375216949 | -1.90912138160010 |
| O | 0.04839176550259  | 4.49878110148716 | -1.90912277051704 |
| N | -1.66583307220207 | 3.53416980002856 | -1.90912001077968 |

**2a** E = -168.2629612 au

E = -168.2666545 au [DLPNO-CCSD(T)/def2-TZVPP]

ZPE = 0.01948947 au

$G_{\text{corr}} = -0.00313578 \text{ au}$

|   |                   |                   |                  |
|---|-------------------|-------------------|------------------|
| C | -1.78064742752972 | -1.07938907093976 | 0.43501113698866 |
| N | -2.10498744736413 | 0.13811769798509  | 1.14328689919579 |
| O | -0.74690004097283 | -0.58828876776935 | 0.99106263550978 |
| H | -2.41957679413331 | -0.13536081927598 | 2.08171679830576 |

**(2a→6a)<sup>‡</sup>** E = -168.256123 au  
E = -168.243125 au [DLPNO-CCSD(T)/def2-TZVPP]  
ZPE = 0.017095011 au  
 $\nu = -659.27 \text{ cm}^{-1}$

|   |                   |                   |                   |
|---|-------------------|-------------------|-------------------|
| C | 0.55958146031848  | 0.77331167386658  | -0.27800308585432 |
| N | -0.78212182439028 | 0.21636780028135  | 0.16276755290417  |
| O | 1.09058200114419  | -0.19917564432012 | 0.14270951212408  |
| H | -0.86804163707239 | -0.79050382982782 | -0.02747397917393 |

**(2a→8a)<sup>‡</sup>** E = -168.1337155 au  
E = -168.103891 au [DLPNO-CCSD(T)/def2-TZVPP]  
ZPE = 0.015922687 au  
 $\nu = -703.23 \text{ cm}^{-1}$

|   |                   |                   |                   |
|---|-------------------|-------------------|-------------------|
| O | 0.76515945710124  | 0.07744905417473  | -0.00001635686473 |
| C | -0.16717226396723 | -0.95998428432822 | 0.00001734651239  |
| N | 0.54330787793760  | 1.29473153805432  | 0.00000975622052  |
| H | -1.14129507107161 | -0.41219630790084 | -0.00001074586818 |

**(2a→9a)<sup>‡</sup>** E = -168.2145269 au  
E = -168.2254216 au [DLPNO-CCSD(T)/def2-TZVPP]  
ZPE = 0.01521499 au  
 $\nu = -213.15 \text{ cm}^{-1}$

|   |                   |                   |                   |
|---|-------------------|-------------------|-------------------|
| C | -1.46702529015852 | -0.33888904298160 | 0.66796634809205  |
| N | 0.75939066590362  | -0.34016224330779 | -0.79531551811219 |
| O | -0.41569896193754 | 0.05398342180482  | 0.82340804865586  |
| H | 1.12333358619244  | 0.62506786448457  | -0.69605887863572 |

**3a** E = -168.2955045 au  
E = -168.3042721 au [DLPNO-CCSD(T)/def2-TZVPP]  
ZPE = 0.020233 au  
 $G_{\text{corr}} = -0.00325614 \text{ au}$

|   |                   |                  |                   |
|---|-------------------|------------------|-------------------|
| C | -0.85955314016802 | 1.61387695317389 | -0.08486445259494 |
| N | -1.32388621826398 | 2.04487474811738 | -1.06786756586027 |



|   |                   |                  |                   |
|---|-------------------|------------------|-------------------|
| O | -1.80539361517901 | 2.71482021837646 | -2.10898095443976 |
| H | -2.13010874638898 | 2.04054842033226 | -2.72851697710503 |

**(3a→4a)<sup>‡</sup>** E = -168.2629713 au  
E = -168.2612747 au [DLPNO-CCSD(T)/def2-TZVPP]  
ZPE = 0.018447646 au  
 $\nu = -205.90 \text{ cm}^{-1}$

|   |                   |                   |                   |
|---|-------------------|-------------------|-------------------|
| C | 0.73972977710951  | -0.59424516467549 | 0.78928798308907  |
| N | -0.46807674011754 | -0.51532229347582 | 0.58600683579678  |
| O | -0.09226916127479 | 0.07859966041202  | -0.77264426180291 |
| H | -0.17938387571718 | 1.03096779773929  | -0.60265055708293 |

**4a** E = -168.2609372 au  
E = -168.2622129 au [DLPNO-CCSD(T)/def2-TZVPP]  
ZPE = 0.01897676 au  
 $G_{\text{corr}} = -0.00525445 \text{ au}$

|   |                   |                  |                  |
|---|-------------------|------------------|------------------|
| C | -1.64562315722926 | 0.54408144137434 | 0.16528557353621 |
| N | -1.25263371389100 | 1.52223678220238 | 0.80456280595795 |
| O | -0.06696729602143 | 0.51491861623967 | 0.95648788302079 |
| H | -0.24925511285831 | 0.11286974018361 | 1.82236148748504 |

**5a** E = -168.3206177 au  
E = -168.3238207 au [DLPNO-CCSD(T)/def2-TZVPP]  
ZPE = 0.01929082 au  
 $G_{\text{corr}} = -0.00046434 \text{ au}$

|   |                   |                  |                   |
|---|-------------------|------------------|-------------------|
| C | -0.34454589354295 | 4.03586676319773 | -1.90799549297866 |
| H | -1.05017934830968 | 3.24443403236054 | -1.91091010616958 |
| N | 0.44198468324965  | 4.88274211958656 | -1.90901673572742 |
| O | 1.25458713860298  | 5.76386917485515 | -1.90856274512432 |

**6a** E = -168.4333754 au  
E = -168.4363605 au [DLPNO-CCSD(T)/def2-TZVPP]  
ZPE = 0.02128412 au  
 $G_{\text{corr}} = -0.00159585 \text{ au}$

|   |                   |                  |                  |
|---|-------------------|------------------|------------------|
| C | 0.96626506935932  | 2.83145484079621 | 0.80551972829010 |
| O | 2.12535651264776  | 2.94008477982728 | 0.80551971563945 |
| N | -0.24335126668386 | 2.86688785792254 | 0.80551971658862 |
| H | -0.85412831532321 | 2.06844248145397 | 0.80551971948183 |

**6a<sup>lin</sup>** E = -168.4232549 au  
 E = -168.4274772 au [DLPNO-CCSD(T)/def2-TZVPP]  
 ZPE = 0.02050292au  
 v=-584.04 cm<sup>-1</sup>

|   |                   |                  |                  |
|---|-------------------|------------------|------------------|
| C | 0.64044975208627  | 2.89322381353446 | 0.80551968681540 |
| O | 1.81328976756704  | 2.89322389978316 | 0.80551991791243 |
| N | -0.53766412717720 | 2.89322372841662 | 0.80551925642187 |
| H | -1.52593339247612 | 2.89322391826576 | 0.80552001885031 |

**(6a→7a)<sup>‡</sup>** E = -168.2827099 au  
 E = -168.2871753 au [DLPNO-CCSD(T)/def2-TZVPP]  
 ZPE = 0.015600737 au  
 v= -1629.63 cm<sup>-1</sup>

|   |                   |                   |                   |
|---|-------------------|-------------------|-------------------|
| C | 0.13589816771447  | -0.07972242492801 | -0.30561285611060 |
| N | -0.86062816930320 | -0.24516485249555 | -0.93901360165973 |
| O | 1.08508666591477  | 0.13104263232953  | 0.50207476424000  |
| H | -0.36035666432604 | 0.19384464509403  | 0.74255169353033  |

**6a<sup>t</sup>** E = -168.3022910 au  
 E = -168.2991241 au [DLPNO-CCSD(T)/def2-TZVPP]  
 ZPE = 0.01775636 au  
 G<sub>corr</sub> = -0.00691705 au

|   |                   |                  |                  |
|---|-------------------|------------------|------------------|
| C | 1.06901104930134  | 2.47215268368481 | 0.80550995888422 |
| O | 2.04658722763175  | 3.14929125669696 | 0.80552587603558 |
| N | -0.24555896811204 | 2.94765500399105 | 0.80552028706898 |
| H | -0.87589730882105 | 2.13777101562717 | 0.80552275801122 |

**(6a<sup>t</sup>→10a<sup>t</sup>+11)<sup>‡</sup>** E = -168.2823511 au  
 E = -168.285649714212 [DLPNO-CCSD(T)/def2-TZVPP]au  
 ZPE = 0.01521473 au  
 v= -317.13 cm<sup>-1</sup>

|   |                   |                  |                  |
|---|-------------------|------------------|------------------|
| C | 1.34048698789278  | 2.41423654409403 | 0.83164098316365 |
| O | 2.17702553525212  | 3.18139753053226 | 0.79239588480217 |
| N | -0.53730935056251 | 3.02272659051628 | 0.78610292277442 |
| H | -0.98606117258240 | 2.08850929485736 | 0.81193908925974 |

**7a** E = -168.3890715 au  
 E = -168.3985843 au [DLPNO-CCSD(T)/def2-TZVPP]  
 ZPE = 0.02146139 au

$G_{\text{corr}} = -0.00166105 \text{ au}$   
 C      -0.23641834173709      3.21081438967257      1.06452357291857  
 N      0.91688640193289      3.18690705109071      1.06360184304808  
 O      -1.53200187281155      3.16300072654801      1.06272250172201  
 H      -1.91102829738425      4.05430774268870      1.09558988231134

**8a**      E = -168.1797290 au  
           E = -168.1709468 au [DLPNO-CCSD(T)/def2-TZVPP]  
           ZPE = 0.01821034 au  
            $G_{\text{corr}} = -0.00485774 \text{ au}$

C      -0.10828460909275      3.57295356066578      -1.90912127372311  
 H      -1.20001977822295      3.58525360356254      -1.90912127055463  
 O      0.37579722475423      4.71437565650050      -1.90912126041401  
 N      1.03443144256147      5.70787425927118      -1.90912127530824

**9a**      E = -168.2240239 au  
           E = -168.2208875 au [DLPNO-CCSD(T)/def2-TZVPP]  
           ZPE = 0.01779815 au  
            $G_{\text{corr}} = -0.00590695 \text{ au}$

O      -0.96284153753794      1.35480094250717      -0.26282090804500  
 C      -1.91091376040435      1.21502848910161      0.37106474220646  
 N      0.20448259399384      1.12510133441277      -1.12515646414026  
 H      0.53078959394845      2.09946800397844      -1.15239424002120

**(9a→10a+11)\***      E = -168.2234052 au  
                           E = -168.228077 au [DLPNO-CCSD(T)/def2-TZVPP]  
                           ZPE = 0.01316432 au  
                            $v = -41.00 \text{ cm}^{-1}$

O      -1.68089104291763      1.85055412143942      0.13335026046685  
 C      -2.07643048155440      0.94348997008024      0.67044944088722  
 N      1.22913921032957      1.19376703243244      -1.47792073205760  
 H      0.38969920414248      1.80658764604781      -1.49518583929644

**(9a→10a<sup>†</sup>+11)<sup>mecp</sup>**      E = -168.2209691 au  
                                   E = -168.2246971 au [DLPNO-CCSD(T)/def2-TZVPP]  
                                   ZPE = 0.01626946 au  
                                    $G_{\text{corr}} = -0.02880679 \text{ au}$

O      -1.05419975292298      1.42175750180201      -0.18318058479260  
 C      -1.98901316301379      1.16750464250559      0.41312205255747

|   |                  |                  |                   |
|---|------------------|------------------|-------------------|
| N | 0.31701493155335 | 1.10331275961215 | -1.20485124236692 |
| H | 0.58771487438343 | 2.10182386608019 | -1.19439709539795 |

**10a** E = -55.0781068 au  
E = -55.06949046 au [DLPNO-CCSD(T)/def2-TZVPP]  
ZPE = 0.00747381 au  
G<sub>corr</sub> = -0.00873648 au

|   |                   |                  |                  |
|---|-------------------|------------------|------------------|
| N | -2.03304859424175 | 2.41855659000000 | 1.63464752000000 |
| H | -0.99303218575825 | 2.41855659000000 | 1.63464752000000 |

**10a<sup>t</sup>** E = -55.1397085 au  
E = -55.14230774 au [DLPNO-CCSD(T)/def2-TZVPP]  
ZPE = 0.00737551 au  
G<sub>corr</sub> = -0.00987581 au

|   |                   |                   |                  |
|---|-------------------|-------------------|------------------|
| N | -3.91241128389151 | -0.28287744000000 | 1.03861521000000 |
| H | -2.87033479610849 | -0.28287744000000 | 1.03861521000000 |

**11** E = -113.1588191 au  
E = -113.1578132 au [DLPNO-CCSD(T)/def2-TZVPP]  
ZPE = 0.0050407 au  
G<sub>corr</sub> = -0.01407749 au

|   |                   |                  |                   |
|---|-------------------|------------------|-------------------|
| O | -0.48650730345425 | 4.49393229000000 | -0.11176025000000 |
| C | -1.61156339654575 | 4.49393229000000 | -0.11176025000000 |

**12a<sup>s</sup>** E = -168.3018752 au  
E = -168.259891 au [DLPNO-CCSD(T)/def2-TZVPP]  
ZPE = 0.0198881 au  
G<sub>corr</sub> = -0.0038770 au

|   |                   |                  |                   |
|---|-------------------|------------------|-------------------|
| C | -0.40202269687798 | 3.25087700352221 | -1.90912970372595 |
| H | 0.17463034816257  | 2.33184123629294 | -1.90911691537606 |
| O | -0.04188920542141 | 4.50139082904624 | -1.90912365936774 |
| N | -1.59328650586319 | 3.63135456113861 | -1.90911480153024 |

**12a<sup>t</sup>** E = -168.3045694 au  
E = -168.3019826 au [DLPNO-CCSD(T)/def2-TZVPP]  
ZPE = 0.01858447 au  
G<sub>corr</sub> = -0.00631822 au

|   |                   |                  |                   |
|---|-------------------|------------------|-------------------|
| C | -0.40661470439868 | 3.41504358419519 | -1.90911571798755 |
|---|-------------------|------------------|-------------------|

|   |                   |                  |                   |
|---|-------------------|------------------|-------------------|
| H | 0.10378364494474  | 2.43481109947648 | -1.90912329719424 |
| O | 0.20519416343714  | 4.48155439603754 | -1.90912317704137 |
| N | -1.76493116398321 | 3.38405455029079 | -1.90912288777682 |

**(6a→13a)<sup>‡</sup>** E = -505.2501650 au [DLPNO-CCSD(T)/def2-TZVPP]  
 ZPE = 0.0705287 au  
 v = -497.87 cm<sup>-1</sup>

|   |                   |                   |                   |
|---|-------------------|-------------------|-------------------|
| C | -0.48785009895959 | -1.71275675978757 | 0.00092495330424  |
| C | 1.72505634962864  | 0.43110975159478  | 0.00011179243041  |
| C | -1.23805765839423 | 1.27956482765083  | -0.00104319579390 |
| N | -1.49316980483169 | 0.05015887173317  | -0.00034971390189 |
| N | 0.78886891129243  | 1.26761845463499  | -0.00058050457847 |
| N | 0.70297338294203  | -1.31578925393083 | 0.00100965995654  |
| O | -1.36030714966364 | -2.49075518129588 | 0.00115407052782  |
| O | -1.47266612467674 | 2.42507823581774  | -0.00179508726755 |
| O | 2.83430412559817  | 0.06141786546602  | 0.00054720964105  |
| H | 1.38988537651103  | -2.06364379334217 | 0.00159364757172  |
| H | -2.48504317454505 | -0.16744019148726 | -0.00043268845662 |
| H | 1.09600586509863  | 2.23543717294618  | -0.00114014343335 |

**13a** E = -505.3966456 au [DLPNO-CCSD(T)/def2-TZVPP]  
 ZPE = 0.0806177 au  
 G<sub>corr</sub> = 0.0488471 au

|   |                   |                   |                   |
|---|-------------------|-------------------|-------------------|
| C | -5.95987111189906 | -0.76898334784478 | -0.25430146818358 |
| C | -3.81468655402400 | 0.46931016390181  | -0.25465675658231 |
| C | -5.95973374430978 | 1.70785344323494  | -0.25581589103029 |
| N | -6.58175978799531 | 0.46946543304219  | -0.25522464344508 |
| N | -4.57644091149765 | 1.62686159193010  | -0.25548887959842 |
| N | -4.57656747773926 | -0.68815984334028 | -0.25411816186883 |
| O | -6.56158767635043 | -1.81322124995590 | -0.25401359152987 |
| O | -6.56133074270634 | 2.75215510925045  | -0.25658055200711 |
| O | -2.60954806264116 | 0.46924375327036  | -0.25444804090733 |
| H | -4.07253406157631 | -1.56232170569924 | -0.25352179048819 |
| H | -7.59090254476071 | 0.46951227769129  | -0.25551168398513 |
| H | -4.07228625449997 | 2.50095461451908  | -0.25592120037385 |

**(13a→13a')<sup>‡</sup>** E = -505.2947448 au [DLPNO-CCSD(T)/def2-TZVPP]  
 ZPE = 0.0751617 au  
 v = -1841.81 cm<sup>-1</sup>

|   |                   |                   |                  |
|---|-------------------|-------------------|------------------|
| C | -0.39790267938384 | -1.14762405195413 | 0.00056596299664 |
| C | 1.23157837127098  | 0.40258097110864  | 0.00003821503392 |

|   |                   |                   |                   |
|---|-------------------|-------------------|-------------------|
| C | -0.87112156533068 | 1.11759769416233  | -0.00084300291233 |
| N | -1.30946876560151 | -0.19016524179067 | -0.00025755858831 |
| N | 0.90428398519048  | -0.89261096706232 | 0.00073357957829  |
| N | 0.41129125653533  | 1.45639273998276  | -0.00074447837292 |
| O | -0.81136630702322 | -2.40478899765719 | 0.00124823374296  |
| H | -0.02030779643076 | -2.96654847635205 | 0.00176810572770  |
| O | -1.92651849022957 | 1.82263423560152  | -0.00141989082215 |
| H | -2.37987567186441 | 0.52701543961248  | -0.00083694951405 |
| O | 2.53412178610636  | 0.65544682510351  | 0.00014788691758  |
| H | 2.63528587676083  | 1.62006982924512  | -0.00040010378732 |

**13a'** E = -505.3559772 au [DLPNO-CCSD(T)/def2-TZVPP]  
 ZPE = 0.0799845 au  
 G<sub>corr</sub> = 0.0485088 au

|   |                   |                   |                   |
|---|-------------------|-------------------|-------------------|
| C | -0.39208420137462 | -1.09861208288244 | 0.00055563149719  |
| C | 1.22268134357151  | 0.43100256029918  | 0.00000721160930  |
| C | -0.92278212076755 | 1.25885140439554  | -0.00098929060572 |
| N | -1.30647139243906 | -0.12192782124799 | -0.00022123806379 |
| N | 0.89018863017767  | -0.88562222077574 | 0.00069988126628  |
| N | 0.42930877207051  | 1.46755531679115  | -0.00076314911103 |
| O | -0.87725531973677 | -2.33545025054537 | 0.00119899934396  |
| H | -0.11910103226722 | -2.94106556592663 | 0.00169184604267  |
| O | -1.78485983032285 | 2.10140492353553  | -0.00158008607290 |
| H | -2.29392701286402 | -0.33332794064845 | -0.00030007154888 |
| O | 2.53620457387127  | 0.64500661818154  | 0.00017188985121  |
| H | 2.66033659008112  | 1.60698305882369  | -0.00035562420828 |

**(13a'→13a'')<sup>‡</sup>** E = -505.3010055 au [DLPNO-CCSD(T)/def2-TZVPP]  
 ZPE = 0.0749939 au  
 ν = -1871.21 cm<sup>-1</sup>

|   |                   |                   |                   |
|---|-------------------|-------------------|-------------------|
| C | -0.35421779968099 | -1.10474446646278 | 0.00057930246752  |
| C | 1.37255608063194  | 0.27696294145329  | 0.00014120413296  |
| C | -0.77826558729241 | 1.30270269589097  | -0.00093729523915 |
| N | -1.20974681510718 | -0.06908944130156 | -0.00019381009397 |
| N | 0.57784665205955  | 1.37805231584251  | -0.00068765574463 |
| N | 0.94783887424064  | -1.00153856380523 | 0.00079589157254  |
| O | -0.92904094982765 | -2.29937020663364 | 0.00114172490080  |
| O | -1.59126310024697 | 2.18904662496097  | -0.00165819174490 |
| O | 2.56756153593461  | 0.70446998958889  | 0.00015699225806  |
| H | -0.21941822249904 | -2.96159109097510 | 0.00164952873483  |
| H | -2.20653026007796 | -0.23010073603559 | -0.00031260201873 |
| H | 1.82267959186546  | 1.81519993747729  | -0.00067508922534 |

**13a''** E = -505.3715927 au [DLPNO-CCSD(T)/def2-TZVPP]  
 ZPE = 0.0800630 au  
 G<sub>corr</sub> = 0.0483871 au

|   |                   |                   |                   |
|---|-------------------|-------------------|-------------------|
| C | -0.32896362477842 | -1.10391814442830 | 0.00058054698533  |
| C | 1.53906998018311  | 0.22956523221266  | 0.00020153909107  |
| C | -0.72460933061174 | 1.26730976086506  | -0.00089622232410 |
| N | -1.18852629803682 | -0.05074454131790 | -0.00022707120118 |
| N | 0.64538959418434  | 1.32527178986840  | -0.00063427971286 |
| N | 0.95201025318531  | -1.02736044814967 | 0.00082194345167  |
| O | -0.95240208534956 | -2.28095569372518 | 0.00112984280899  |
| O | -1.46897139595632 | 2.21614120613445  | -0.00161400555427 |
| O | 2.72712801070444  | 0.42486751595284  | 0.00032936351713  |
| H | -0.26504715410726 | -2.96558823753485 | 0.00167535368912  |
| H | -2.18712446037774 | -0.19340597800515 | -0.00037353295397 |
| H | 1.06064551096065  | 2.24567753812765  | -0.00108747779695 |

**(13a''→14a)<sup>‡</sup>** E = -505.3176100 au [DLPNO-CCSD(T)/def2-TZVPP]  
 ZPE = 0.0751531 au  
 ν = -1883.20 cm<sup>-1</sup>

|   |                   |                   |                   |
|---|-------------------|-------------------|-------------------|
| C | -0.53701206545234 | -1.13489038125433 | 0.00055549418407  |
| C | 1.50106705811209  | 0.08098951171517  | 0.00026813177846  |
| C | -0.72507300279980 | 1.24949850619865  | -0.00088418877190 |
| N | -1.30669342946638 | -0.03389460743839 | -0.00027272589470 |
| N | 0.65037724565239  | 1.21568777177501  | -0.00056914466747 |
| N | 0.79328591745427  | -1.09914500344368 | 0.00082374172611  |
| O | -0.90389026388185 | -2.35101246594852 | 0.00120292032595  |
| O | -1.39355732575633 | 2.25052278323091  | -0.00159902840417 |
| O | 2.69686997491749  | 0.20018060201399  | 0.00044334197994  |
| H | 0.42440572148216  | -2.39749850545241 | 0.00150285244484  |
| H | -2.31396531792357 | -0.09298917043791 | -0.00048539371728 |
| H | 1.11418548766188  | 2.11255095904151  | -0.00098600098385 |

**(7a→14a)<sup>‡</sup>** E = -505.1754956 au [DLPNO-CCSD(T)/def2-TZVPP]  
 ZPE = 0.0709824 au  
 ν = -574.36 cm<sup>-1</sup>

|   |                   |                   |                   |
|---|-------------------|-------------------|-------------------|
| N | -1.54907074366691 | 0.31144950384731  | 0.00000212419036  |
| C | -1.37123205771312 | -0.85556972962553 | 0.00000076758200  |
| O | -1.89147762771899 | -2.04309292555906 | -0.00000036090342 |
| H | -1.14052008046841 | -2.66727543522772 | -0.00000118396188 |
| N | 0.50471021194101  | -1.49715986107987 | -0.00000034713943 |
| C | 1.42652117283143  | -0.75974321701685 | 0.00000008332542  |
| O | 2.71502023426275  | -0.61658316328993 | 0.00000073615128  |

|   |                   |                  |                   |
|---|-------------------|------------------|-------------------|
| H | 2.88018968933427  | 0.34584414941777 | 0.00000016282200  |
| N | 1.04431662117466  | 1.18582333760036 | -0.00000065423491 |
| C | -0.05528338037372 | 1.61529284448472 | -0.00000033913795 |
| O | -0.82356120089424 | 2.65961020743179 | -0.00000096423707 |
| H | -1.73961283870874 | 2.32140428901702 | -0.00000002445638 |

**14a** E = -505.3585087 au [DLPNO-CCSD(T)/def2-TZVPP]

ZPE = 0.0803730 au

G<sub>corr</sub> = 0.0491488au

|   |                   |                  |                   |
|---|-------------------|------------------|-------------------|
| C | -5.61818808008737 | 6.31578868590625 | 0.03659415106329  |
| C | -3.54842319801581 | 7.11840781750522 | 0.18275274239121  |
| C | -5.25254072641922 | 8.49810453626955 | -0.19485844670471 |
| N | -6.14853299813893 | 7.51322861546614 | -0.17780908607787 |
| N | -4.32805874212216 | 6.04537960453887 | 0.22493721664488  |
| N | -3.94264223101986 | 8.37366339077496 | -0.02272783597432 |
| O | -6.46821794309869 | 5.29320930387458 | 0.06467164108445  |
| H | -5.94464409785174 | 4.49397124579717 | 0.22822076764821  |
| O | -5.70393286125159 | 9.73186664742941 | -0.40322540068093 |
| H | -6.66501181145743 | 9.66737467507847 | -0.51117819752431 |
| O | -2.24809998822473 | 6.90716810974908 | 0.36563848919959  |
| H | -1.80946523231227 | 7.76956284760999 | 0.30764874893054  |

**(6a→15a)<sup>‡</sup>**

E = -505.1584140 au [DLPNO-CCSD(T)/def2-TZVPP]

ZPE = 0.0711852 au

v = -655.74 cm<sup>-1</sup>

|   |                   |                   |                   |
|---|-------------------|-------------------|-------------------|
| C | -0.71267955727902 | -1.38801714178338 | 0.02181681771459  |
| C | 1.22652391496898  | 1.45191557578232  | 0.12842058457994  |
| C | -0.86351102621718 | 1.13608712188513  | -0.15550871566796 |
| N | -1.34793387887918 | -0.08564865043374 | -0.03003103335093 |
| N | 0.50807662631386  | -1.40949784242201 | -0.49639367585984 |
| O | -1.41226400604080 | -2.28573262475227 | 0.46046851077143  |
| O | -1.29121439608485 | 2.21731472390731  | -0.30852706657925 |
| H | 0.99426294731823  | -2.23695216770232 | -0.15168610941736 |
| H | -2.33215479366708 | -0.14238755957665 | 0.22482979356521  |
| O | 1.31642498381869  | 2.62710191476366  | 0.12217667474068  |
| N | 1.58361218985771  | 0.27609813956354  | 0.34984615279834  |
| H | 2.33085699589064  | -0.16028148923160 | -0.16541193329485 |

**15a** E = -505.3042108 au [DLPNO-CCSD(T)/def2-TZVPP]

ZPE = 0.0789892 au

G<sub>corr</sub> = 0.04698839 au



|   |                   |                   |                   |
|---|-------------------|-------------------|-------------------|
| C | -0.69162021271635 | -1.25678193526211 | 0.00520500427520  |
| C | 0.80089291134892  | 1.23154829855310  | -0.02221724671505 |
| C | -0.73342840681979 | 1.23519395342103  | 0.02423166950581  |
| N | -1.31925609357902 | -0.01733100012507 | -0.04106585836669 |
| N | 0.68060092443072  | -1.21202202493293 | -0.10797469190230 |
| O | -1.29965089044205 | -2.29548220546475 | 0.11510642567158  |
| O | -1.37132414518227 | 2.25014368727263  | 0.07679616127946  |
| H | 1.13510716991878  | -1.99815072194138 | 0.33531250538706  |
| H | -2.33077409273142 | -0.04880451574533 | -0.01149153779788 |
| O | 1.44314069799532  | 2.24727528269474  | -0.11972343587910 |
| N | 1.38633558866033  | -0.00486561940820 | 0.05133719613921  |
| H | 2.34110693883248  | -0.04865902884633 | -0.27855451456364 |

**(6a→16a)<sup>‡</sup>** E = -336.8231112 au [DLPNO-CCSD(T)/def2-TZVPP]  
ZPE = 0.04569825 au  
v = -570.13 cm<sup>-1</sup>

|   |                   |                  |                   |
|---|-------------------|------------------|-------------------|
| N | 0.10317440403745  | 2.94005653988558 | -0.99274198657801 |
| H | -0.69062460253622 | 3.55617172360602 | -1.11650595160502 |
| N | 1.81560176192155  | 1.51487497208458 | -0.71962108429703 |
| H | 2.60864549857354  | 0.90800027022407 | -0.55208879414533 |
| C | 2.00601366823774  | 2.77233925132749 | -0.79838498080395 |
| C | -0.09319114291571 | 1.68556935522016 | -0.89250792594448 |
| O | -0.72367833044037 | 0.70580598766993 | -0.85603838087108 |
| O | 2.63431986312191  | 3.75435771998173 | -0.81557338575494 |

**16a** E = -336.8782547 au [DLPNO-CCSD(T)/def2-TZVPP]  
ZPE = 0.05018035 au  
G<sub>corr</sub> = 0.02202314 au

|   |                   |                  |                   |
|---|-------------------|------------------|-------------------|
| N | 0.21981745044831  | 2.91720794203064 | -0.86031853698264 |
| H | -0.40092865322203 | 3.55125364021585 | -1.34007495002040 |
| N | 1.69527451908885  | 1.54206767415439 | -0.82559696867145 |
| H | 2.31594896359015  | 0.90805897057463 | -0.34569948680680 |
| C | 1.63569051573093  | 2.95946384869391 | -0.75557345634142 |
| C | 0.27938940744893  | 1.49982166560358 | -0.93029912943643 |
| O | -0.52528995636225 | 0.63387241539185 | -1.03400396319342 |
| O | 2.44035887327709  | 3.82542966333513 | -0.65189599854743 |

**(5a→17a)<sup>‡</sup>** E = -504.8385143 au [DLPNO-CCSD(T)/def2-TZVPP]  
ZPE = 0.0642533 au  
v = -828.36 cm<sup>-1</sup>

|   |                   |                  |                  |
|---|-------------------|------------------|------------------|
| C | -1.15829079008246 | 0.85341924754743 | 0.50889047888366 |
|---|-------------------|------------------|------------------|

|   |                   |                   |                   |
|---|-------------------|-------------------|-------------------|
| N | -0.24595468498199 | 1.63685741059558  | 0.48707883109719  |
| O | 0.24814808561517  | 2.74247445227926  | 0.65220410642148  |
| C | 1.38380016503300  | 0.61912690787482  | -0.17490731726414 |
| N | 1.55733410544343  | -0.52086767415849 | -0.51745604150679 |
| O | 2.24736079448825  | -1.44197256862846 | -0.93001855135494 |
| C | -0.22329418207901 | -1.47397908208864 | -0.32932739023683 |
| N | -1.31327993205191 | -1.11474659846612 | 0.03081445243612  |
| H | -2.20928809356506 | 0.80584033907046  | 0.75424188166945  |
| O | -2.49768195965614 | -1.29773747719095 | 0.27214066458447  |
| H | 0.28638401271507  | -2.35601018070579 | -0.68898686313938 |
| H | 1.92476247912165  | 1.54759522387089  | -0.06467425159029 |

**17a** E = -505.0534103 au [DLPNO-CCSD(T)/def2-TZVPP]

ZPE = 0.0761698 au

G<sub>corr</sub> = 0.0449806 au

|   |                   |                   |                   |
|---|-------------------|-------------------|-------------------|
| C | -3.07535985281192 | 0.57819439314978  | 0.81348054665169  |
| N | -2.28558891243032 | 0.60085557492204  | -0.29017962752120 |
| O | -2.24961534466379 | 1.62864867315460  | -1.02264672217728 |
| C | -1.53545786096601 | -0.48587888538018 | -0.60407072069849 |
| N | -1.57130198009777 | -1.59186815079085 | 0.18199491385531  |
| O | -0.87233580180556 | -2.60126083692377 | -0.11265347905549 |
| C | -2.36177920251364 | -1.60854393983915 | 1.28531625902561  |
| N | -3.11626556847975 | -0.52551053546267 | 1.60244969424670  |
| H | -3.67036592889570 | 1.43680076426469  | 1.06313473300921  |
| O | -3.85359854085103 | -0.54466150047199 | 2.62714653149029  |
| H | -2.39304435953863 | -2.48330422362540 | 1.90777392941076  |
| H | -0.91169449694586 | -0.47108343299710 | -1.47831636823710 |

**1b** E = -207.5459548 au

E = -207.5546345 au [DLPNO-CCSD(T)/def2-TZVPP]

ZPE = 0.04806949 au

G<sub>corr</sub> = 0.02155320 au

|   |                   |                   |                  |
|---|-------------------|-------------------|------------------|
| C | -2.02763413032465 | 1.42729196919709  | 1.92715709292705 |
| O | -2.33945413821240 | 2.60383679739116  | 1.44675217390460 |
| N | -1.42187087664983 | 1.21900538526564  | 0.85029409476579 |
| C | -2.33844451709199 | 0.78407389062204  | 3.21212405874346 |
| H | -1.93042629091305 | 1.39201134735744  | 4.02174098952329 |
| H | -3.42187648536732 | 0.73702366404124  | 3.33524391121797 |
| H | -1.91617221144074 | -0.21849215387462 | 3.25235737891782 |

**2b** E = -207.4893261 au

E = -207.5026112 au [DLPNO-CCSD(T)/def2-TZVPP]

ZPE = 0.04703287 au

G<sub>corr</sub> = 0.02066463 au

|   |                   |                   |                  |
|---|-------------------|-------------------|------------------|
| C | -1.83336873635980 | -0.93343654583831 | 0.26436192965937 |
| N | -2.13758362250106 | -0.31196387727060 | 1.31127273376937 |
| O | -0.66942642404626 | -0.49108448881828 | 1.12371328042572 |
| C | -2.84104816117606 | 0.32843759645915  | 2.36039051118674 |
| H | -2.62086044482406 | -0.16442238852745 | 3.30932762655009 |
| H | -2.54931342393200 | 1.37902587468987  | 2.41525810084064 |
| H | -3.90600493716074 | 0.24893433930561  | 2.13781669756808 |

**3b** E = -207.5152314 au

E = -207.5324076 au [DLPNO-CCSD(T)/def2-TZVPP]

ZPE = 0.04896734 au

G<sub>corr</sub> = 0.02233808 au

|   |                   |                  |                   |
|---|-------------------|------------------|-------------------|
| C | -0.66476666847099 | 1.77215130072839 | -0.04832544572994 |
| N | -1.25621542280429 | 2.09596623823244 | -1.00433147199521 |
| O | -1.91420584014355 | 2.56520864352626 | -2.04758846841957 |
| C | -2.28470191419105 | 1.49184995031023 | -2.94925150424596 |
| H | -1.38864201947019 | 0.98520682879360 | -3.30653706144793 |
| H | -2.79935766330750 | 1.99253458317660 | -3.76442217169529 |
| H | -2.94755109161243 | 0.79431920523246 | -2.43805753646608 |

**4b** E = -207.4821473 au

E = -207.4902111 au [DLPNO-CCSD(T)/def2-TZVPP]

ZPE = 0.04659561 au

G<sub>corr</sub> = 0.02032906 au

|   |                   |                   |                  |
|---|-------------------|-------------------|------------------|
| C | -1.53330435662209 | -0.56051696914717 | 0.94544050562182 |
| N | -2.52672908603957 | -0.22973279746130 | 1.43487448840367 |
| O | -0.44975073534983 | -0.94557616169557 | 0.36996520833938 |
| C | 0.78433434383605  | -0.59204217503281 | 1.05840010465893 |
| H | 0.85744938878985  | 0.49131700889518  | 1.14088758198080 |
| H | 0.79668498674918  | -1.05619264763193 | 2.04339437563012 |
| H | 1.58017654863639  | -0.98676636792638 | 0.43506683536527 |

**5b** E = -207.5578098 au

E = -207.5720235 au [DLPNO-CCSD(T)/def2-TZVPP]

ZPE = 0.04928412 au

G<sub>corr</sub> = 0.02286556 au

|   |                   |                  |                   |
|---|-------------------|------------------|-------------------|
| C | -0.54451137269013 | 4.27938521467067 | -1.90779781776504 |
| N | 0.43098870392561  | 4.89931283527845 | -1.90591452235010 |
| O | 1.45222831703041  | 5.54832442510020 | -1.90376524762395 |
| C | -1.77183186779850 | 3.49607641880245 | -1.91097936690222 |
| H | -2.37549772669307 | 3.72922910618236 | -2.79030703916574 |
| H | -1.54670063947176 | 2.42787067939122 | -1.92391741113963 |
| H | -2.36740741430253 | 3.70942040057454 | -1.02116743505327 |

**6b** E = -207.6507767 au  
E = -207.6641147 au [DLPNO-CCSD(T)/def2-TZVPP]  
ZPE = 0.05049626 au  
G<sub>corr</sub> = 0.02371572 au

|   |                   |                  |                   |
|---|-------------------|------------------|-------------------|
| C | 1.04170135876911  | 2.86978311990100 | 0.80551882186050  |
| O | 2.17150143993012  | 3.18249569706539 | 0.80550680375744  |
| N | -0.13906706627668 | 2.67686225224424 | 0.80553579762926  |
| C | -1.07709957505259 | 1.58623834975811 | 0.80552244034388  |
| H | -2.08808601746815 | 1.98916267596401 | 0.80570807249848  |
| H | -0.95181823155710 | 0.96469248140848 | -0.08321522633039 |
| H | -0.95158317834471 | 0.96445614365877 | 1.69406137024084  |

**7b** E = -207.6058791 au  
E = -207.6235298 au [DLPNO-CCSD(T)/def2-TZVPP]  
ZPE = 0.05036542 au  
G<sub>corr</sub> = -0.00166105 au

|   |                   |                  |                  |
|---|-------------------|------------------|------------------|
| C | -0.23828902192715 | 3.19257913088517 | 1.06387373574314 |
| N | 0.91599655023461  | 3.13443286598369 | 1.06471854914238 |
| O | -1.52400711493021 | 3.21898266308286 | 1.06156216462071 |
| C | -2.11950149083514 | 4.54765417358192 | 1.11336043663790 |
| H | -1.81342766841069 | 5.11741517830476 | 0.23720387683626 |
| H | -3.19137450018652 | 4.37864372861876 | 1.10991305404463 |
| H | -1.80858335394490 | 5.05022284954281 | 2.02807591297498 |

**8b** E = -207.4158252 au  
E = -207.4142088 au [DLPNO-CCSD(T)/def2-TZVPP]  
ZPE = 0.04704898 au  
G<sub>corr</sub> = 0.02028830 au

|   |                   |                  |                   |
|---|-------------------|------------------|-------------------|
| C | -0.21493091941419 | 3.54623099118956 | -1.90964090327531 |
| O | 0.30690294415262  | 4.66352470813109 | -1.90908491267099 |
| N | 0.96845549562585  | 5.66938975585489 | -1.90864952067328 |
| C | -1.71210142688655 | 3.47899126355312 | -1.90922792397508 |

|   |                   |                  |                   |
|---|-------------------|------------------|-------------------|
| H | -2.12162430221207 | 3.97408732871217 | -2.79649538918354 |
| H | -2.02844548031049 | 2.43970393118984 | -1.91070575150415 |
| H | -2.12091061095517 | 3.97123609136931 | -1.02004443871765 |

**10b** E = -94.32325545 au  
E = -94.4745968 au [DLPNO-CCSD(T)/def2-TZVPP]  
ZPE = 0.0397545 au  
G<sub>corr</sub> = 0.0178485 au

|   |                   |                  |                  |
|---|-------------------|------------------|------------------|
| N | -1.01105014989470 | 2.48575056909570 | 2.41271033459398 |
| C | -0.28914645905494 | 2.63450396407486 | 1.38659606731504 |
| H | -1.30061175438286 | 1.51237778566805 | 2.52605342347537 |
| H | -0.00343423903166 | 1.83088473680493 | 0.69972937267578 |
| H | 0.08904021236417  | 3.62926594435644 | 1.14814841193983 |

**10b<sup>t</sup>** E = -94.3826441 au  
E = -94.3893284 au [DLPNO-CCSD(T)/def2-TZVPP]  
ZPE = 0.0366605 au  
G<sub>corr</sub> = 0.0134641 au

|   |                   |                  |                  |
|---|-------------------|------------------|------------------|
| N | -1.85433125550993 | 2.73286244986078 | 2.19386366500947 |
| C | -0.59325893183238 | 2.42614812705311 | 1.64795108699247 |
| H | 0.20651532340176  | 2.96679895763016 | 2.17692449530894 |
| H | -0.38454091226668 | 1.34802438582289 | 1.72555593732893 |
| H | -0.54789815379274 | 2.70587975963302 | 0.58413572536016 |

**12b<sup>t</sup>** E = -207.5432697 au  
E = -207.5533818 au [DLPNO-CCSD(T)/def2-TZVPP]  
ZPE = 0.04691315 au  
G<sub>corr</sub> = 0.01909046 au

|   |                   |                  |                   |
|---|-------------------|------------------|-------------------|
| C | -0.33870242686289 | 3.37868671836396 | -1.90916382135825 |
| O | 0.18179972548886  | 4.49289639986801 | -1.90939973767844 |
| N | -1.71245244843832 | 3.32926756462051 | -1.90874656773578 |
| C | 0.41912011349987  | 2.07836064498067 | -1.90919294678115 |
| H | 0.15328809919558  | 1.49038904417084 | -1.02827709746297 |
| H | 0.15074083931372  | 1.48874227030809 | -2.78821731060413 |
| H | 1.48848736780318  | 2.28040416768790 | -1.91085139837928 |

**1c** E = -504.9455528 au  
E = -504.958993 au [DLPNO-CCSD(T)/def2-TZVPP]  
ZPE = 0.02527087 au

$G_{\text{corr}} = -0.00528488$  au

|   |                   |                   |                  |
|---|-------------------|-------------------|------------------|
| C | -2.01594706044268 | 1.47805216041094  | 1.81347381947748 |
| O | -2.26186752697014 | 2.63185794996228  | 1.28605176891343 |
| N | -1.41659526556269 | 1.12495958760934  | 0.77454861454104 |
| C | -2.37275371489532 | 0.90083353847728  | 3.16854578903193 |
| F | -1.90535519224529 | -0.34426286806536 | 3.26683318556954 |
| F | -3.69898615019715 | 0.88724045315966  | 3.31832403417630 |
| F | -1.83706482968672 | 1.64729804844585  | 4.13673376829026 |

**2c**

$E = -504.9076466$  au

$E = -504.9285786$  au [DLPNO-CCSD(T)/def2-TZVPP]

ZPE = 0.02432172 au

$G_{\text{corr}} = -0.00573660$  au

|   |                   |                   |                  |
|---|-------------------|-------------------|------------------|
| C | -1.46057799128342 | -1.05611202026665 | 0.29023216506596 |
| N | -2.24863201378464 | -0.13616517014413 | 1.11741278877260 |
| O | -0.73573619798223 | -0.19976783851897 | 0.87826653352595 |
| C | -2.55006945374843 | -0.62924012959566 | 2.45303034703973 |
| F | -1.82826081328713 | -1.69051692737730 | 2.83180385039836 |
| F | -3.83898263384173 | -0.96499218421545 | 2.42655600090905 |
| F | -2.36687464607242 | 0.33651693011816  | 3.35006072428834 |

**3c**

$E = -504.9401457$  au

$E = -504.965219$  au [DLPNO-CCSD(T)/def2-TZVPP]

ZPE = 0.02572968 au

$G_{\text{corr}} = -0.00480922$  au

|   |                   |                  |                   |
|---|-------------------|------------------|-------------------|
| C | -1.22956335167660 | 1.62019015203786 | -0.06574145374096 |
| N | -1.35623503654036 | 2.17487622714371 | -1.08905100425486 |
| O | -1.44798745509943 | 2.62600479707281 | -2.33486352611695 |
| C | -1.83792959875230 | 3.98116097284799 | -2.37291732523555 |
| F | -0.94959248776752 | 4.75071689823150 | -1.76197221322461 |
| F | -3.02199069598110 | 4.15223079325195 | -1.80488115869010 |
| F | -1.89521632418267 | 4.27456095941415 | -3.65622297873694 |

**5c**

$E = -504.9618998$  au

$E = -504.9827705$  au [DLPNO-CCSD(T)/def2-TZVPP]

ZPE = 0.02663509 au

$G_{\text{corr}} = -0.00486664$  au

|   |                   |                  |                   |
|---|-------------------|------------------|-------------------|
| C | -0.50475740414075 | 4.30418539354324 | -1.90766520843914 |
| N | 0.47177871047733  | 4.92530638502773 | -1.90581037032903 |
| O | 1.47598181112503  | 5.56368810318656 | -1.90375462005320 |

|   |                   |                  |                   |
|---|-------------------|------------------|-------------------|
| C | -1.73657671753896 | 3.51854919104714 | -1.91086476787997 |
| F | -2.48509299523225 | 3.79949904842018 | -2.98935954830215 |
| F | -1.46881910626420 | 2.20320675182808 | -1.92679716131948 |
| F | -2.47524629842617 | 3.77518420694694 | -0.81959716367696 |

**6c** E = -505.0732803 au  
E = -505.0996842 au [DLPNO-CCSD(T)/def2-TZVPP]  
ZPE = 0.02780237 au  
G<sub>corr</sub> = -0.00283145 au

|   |                   |                  |                   |
|---|-------------------|------------------|-------------------|
| C | 1.02317914739665  | 2.86688333533088 | 0.80552885378589  |
| O | 2.16125472687271  | 3.07178168883198 | 0.80566793007780  |
| N | -0.18757270911688 | 2.78783754789323 | 0.80535168183212  |
| C | -1.02772256007180 | 1.66485117147334 | 0.80548756600176  |
| F | -2.29951611332820 | 2.05899303521579 | 0.80583894166632  |
| F | -0.83231041292179 | 0.89175610088148 | -0.27882815741127 |
| F | -0.83176334883070 | 0.89158784037329 | 1.88959126404740  |

**7c** E = -505.0320341 au  
E = -505.0571288 au [DLPNO-CCSD(T)/def2-TZVPP]  
ZPE = 0.02718689 au  
G<sub>corr</sub> = -0.00303259 au

|   |                   |                  |                  |
|---|-------------------|------------------|------------------|
| C | -0.20440811509960 | 3.18550512932943 | 1.06355463765755 |
| N | 0.94216307336704  | 3.08025786577779 | 1.06076349325584 |
| O | -1.50552658316990 | 3.22745839440031 | 1.06389862068587 |
| C | -2.10417645305970 | 4.49822867732139 | 1.11172825856199 |
| F | -1.75363159349442 | 5.22194580650001 | 0.05723034970452 |
| F | -3.40298606012088 | 4.28435229479010 | 1.10572032063009 |
| F | -1.75062086842254 | 5.14218242188093 | 2.21581204950413 |

**8c** E = -504.9618656 au  
E = -504.8333532 au [DLPNO-CCSD(T)/def2-TZVPP]  
ZPE = 0.02488509 au  
G<sub>corr</sub> = -0.00576733 au

|   |                   |                  |                   |
|---|-------------------|------------------|-------------------|
| C | -0.12355662804657 | 3.59291381625626 | -2.06101639869839 |
| O | 0.39163219842360  | 4.70804545456435 | -1.89459197898218 |
| N | 1.05079888024642  | 5.68568264864502 | -1.76565038566611 |
| C | -1.63040535556604 | 3.59593326100799 | -1.93888637893910 |
| F | -2.03330983633691 | 4.05407223446940 | -0.73593491526646 |
| F | -2.20157022591446 | 4.37741691354915 | -2.87755252886280 |
| F | -2.09430683280603 | 2.35755949150781 | -2.09021629358495 |

**10c** E = -391.8101904 au  
 E = -391.8211279 au [DLPNO-CCSD(T)/def2-TZVPP]  
 ZPE = 0.0171697 au  
 G<sub>corr</sub> = -0.01034153 au

|   |                   |                  |                  |
|---|-------------------|------------------|------------------|
| N | -1.01827963156225 | 2.59858132885160 | 2.45937572275736 |
| C | -0.30251434981564 | 2.67564376544750 | 1.42021816464633 |
| F | -1.42117818994737 | 1.27081790963564 | 2.62731646021225 |
| F | 0.03614105954958  | 1.71942618421521 | 0.60413184144776 |
| F | 0.19062872177570  | 3.82831381185002 | 1.06219542093630 |

**10c<sup>t</sup>** E = -391.8014699 au  
 E = -391.8111298 au [DLPNO-CCSD(T)/def2-TZVPP]  
 ZPE = 0.0156178 au  
 G<sub>corr</sub> = -0.0126405 au

|   |                   |                  |                  |
|---|-------------------|------------------|------------------|
| N | -1.92116557366918 | 2.73103034917503 | 2.20492519862824 |
| C | -0.62512747364079 | 2.43359314666137 | 1.66164092014946 |
| F | 0.31919419281150  | 3.11119778868401 | 2.32636656161403 |
| F | -0.37027755139662 | 1.12341317844698 | 1.76576617079615 |
| F | -0.57613752410487 | 2.78047921703257 | 0.36973205881208 |

**12c<sup>t</sup>** E = -504.9533687 au  
 E = -504.9648335 au [DLPNO-CCSD(T)/def2-TZVPP]  
 ZPE = 0.02427625 au  
 G<sub>corr</sub> = -0.00737850 au

|   |                   |                  |                   |
|---|-------------------|------------------|-------------------|
| C | -0.38442479762729 | 3.44395336982694 | -1.90920057906719 |
| O | 0.17221727022042  | 4.53083960009979 | -1.91056643077397 |
| N | -1.74498078467804 | 3.35208513438113 | -1.90754194573405 |
| C | 0.40757039917773  | 2.10617783988562 | -1.90916313647741 |
| F | 0.08919524139065  | 1.38814116047570 | -0.82100851605953 |
| F | 0.08713930925392  | 1.38681284374612 | -2.99582318448231 |
| F | 1.71556463226262  | 2.33073686158469 | -1.91054508740551 |

**18<sup>t</sup>** E = -167.7144504 au  
 E = -167.7133615 au [DLPNO-CCSD(T)/def2-TZVPP]  
 ZPE = 0.00654035 au  
 G<sub>corr</sub> = -0.01708263 au

|   |                  |                   |                  |
|---|------------------|-------------------|------------------|
| O | 1.46424999817258 | -0.00259487290743 | 0.00000000000000 |
| C | 0.03944719974914 | 0.37299379644463  | 0.00000000000000 |
| N | 0.69112962207829 | 1.44093970646280  | 0.00000000000000 |



**(18<sup>-</sup>→19<sup>+</sup>)<sup>‡</sup>** E = -167.7057207 au  
 E = -167.7029512 au [DLPNO-CCSD(T)/def2-TZVPP]  
 ZPE = 0.005671401 au  
 v = -645.80 cm<sup>-1</sup>

|   |                   |                   |                   |
|---|-------------------|-------------------|-------------------|
| O | -1.00060059785998 | -0.00000000045221 | -0.31665957799478 |
| C | 0.09574651052405  | 0.00000000088133  | 0.61715097621116  |
| N | 0.90485408733593  | -0.00000000042912 | -0.30049139821638 |

**(18<sup>-</sup>→19<sup>t</sup>)<sup>mecp</sup>** E = -167.7356606 au  
 E = -167.7304809 au [DLPNO-CCSD(T)/def2-TZVPP]  
 ZPE = 0.00731264 au  
 G<sub>corr</sub> = -0.03626161 au

|   |                   |                   |                  |
|---|-------------------|-------------------|------------------|
| N | -1.81943340981345 | -1.30451216162390 | 0.30485795534864 |
| C | -2.95679896678547 | -1.20155988239870 | 0.99607117062669 |
| O | -3.99334154340102 | -1.30603890597738 | 0.29449946402467 |

**(18<sup>-</sup>→20<sup>+</sup>)<sup>‡</sup>** E = -167.6893385 au  
 E = -167.6917866 au [DLPNO-CCSD(T)/def2-TZVPP]  
 ZPE = 0.005759451 au  
 v = -488.97 cm<sup>-1</sup>

|   |                   |                   |                   |
|---|-------------------|-------------------|-------------------|
| O | 1.07283547272580  | 0.33365728143010  | -0.09115251257505 |
| C | -0.71491087707728 | -0.49863518595256 | 0.51955013201424  |
| N | -0.35792459564852 | 0.16497790452247  | -0.42839761943919 |

**(18<sup>-</sup>→21<sup>-</sup>)<sup>‡</sup>** E = -167.5801327 au  
 E = -167.5745899 au [DLPNO-CCSD(T)/def2-TZVPP]  
 ZPE = 0.00501813 au  
 v = -781.74 cm<sup>-1</sup>

|   |                   |                   |                   |
|---|-------------------|-------------------|-------------------|
| O | -0.13353624094761 | -0.56707160922127 | -0.00010131972262 |
| C | -1.26312644789502 | -0.48254827477322 | 0.00005174552758  |
| N | 1.39666268884263  | 1.04961988399450  | 0.00004957419504  |

**19<sup>-</sup>** E = -167.8714103 au  
 E = -167.877151 au [DLPNO-CCSD(T)/def2-TZVPP]  
 ZPE = 0.01079919 au  
 G<sub>corr</sub> = -0.01050774 au

|   |                   |                   |                  |
|---|-------------------|-------------------|------------------|
| N | -1.72338041942404 | -1.27070364800725 | 0.53180952702224 |
| C | -2.91004476171998 | -1.27070365431313 | 0.53180953642223 |
| O | -4.13614873885597 | -1.27070364767962 | 0.53180952655553 |

**19<sup>t-</sup>** E = -167.7219703 au  
 E = -167.7366733 au [DLPNO-CCSD(T)/def2-TZVPP]  
 ZPE = 0.0076004 au  
 G<sub>corr</sub> = -0.01685357 au

|   |                   |                   |                  |
|---|-------------------|-------------------|------------------|
| N | -1.77758014512504 | -1.29812975570506 | 0.34771445071865 |
| C | -2.94290156353296 | -1.21362065895732 | 0.91509021306724 |
| O | -4.04909221134197 | -1.30036053533761 | 0.33262392621410 |

**20<sup>-</sup>** E = -167.7653608 au  
 E = -167.7685447 au [DLPNO-CCSD(T)/def2-TZVPP]  
 ZPE = 0.0084541 au

|   |                   |                  |                   |
|---|-------------------|------------------|-------------------|
| C | -2.16892874782373 | 0.36969544148667 | 0.58683908796954  |
| N | -1.14762209593576 | 0.84515394648123 | 0.23798061243646  |
| O | -0.05366420624051 | 1.35436208203210 | -0.13557390040599 |

**21<sup>-</sup>** E = -167.620753 au  
 E = -167.6165984 au [DLPNO-CCSD(T)/def2-TZVPP]  
 ZPE = 0.00724236 au

|   |                   |                   |                   |
|---|-------------------|-------------------|-------------------|
| C | -3.79796875552597 | -0.81708829983059 | -0.14345466550189 |
| O | -2.76053326559232 | -0.21557552909980 | -0.14345470922793 |
| N | -1.65611595888171 | 0.42517286893039  | -0.14345466527018 |

**HN=CH<sub>2</sub>** E = -94.4642650 au  
 E = -94.4383343 au [CASSCF(6,6)/MRACPF/def2-TZVP(-f)]  
 E = -94.3160648 au [CASSCF(6,6)/MRACPF/def2-SVPD]  
 E = -94.4744532 au [DLPNO-CCSD(T)/def2-TZVPP]  
 ZPE = 0.0397557 au  
 G<sub>corr</sub> = 0.0188872 au

|   |                   |                  |                   |
|---|-------------------|------------------|-------------------|
| N | -0.09021966959467 | 0.22283980925514 | -2.20074106045172 |
| H | 0.60360340787980  | 0.15710802129276 | -2.94808763703110 |
| C | 0.45537872755658  | 0.46202435149130 | -1.08671943223383 |
| H | -0.17440039988956 | 0.55735517074328 | -0.20146197103517 |
| H | 1.53234125404786  | 0.58408736721751 | -0.92981463924817 |

**HN=CH<sub>2</sub><sup>lin</sup>** E = -94.4153297 au  
 E = -94.4256171 au [DLPNO-CCSD(T)/def2-TZVPP]  
 ZPE = 0.0365536 au  
 G<sub>corr</sub> = 0.01475828 au  
 ν = -1201.53 cm<sup>-1</sup>

|   |                   |                   |                   |
|---|-------------------|-------------------|-------------------|
| N | -0.91256687213434 | 0.51944329304643  | 0.51842333252416  |
| H | -1.77593527209610 | 0.61242684374653  | 0.98886227793977  |
| C | 0.16373384277842  | 0.40363138065795  | -0.06801585837733 |
| H | 0.94463379168167  | 1.18900828648112  | -0.06089974161023 |
| H | 0.44126934977035  | -0.49541673393203 | -0.65212039047637 |

**H<sub>2</sub>N-OH** E = -131.5284565 au  
E = -131.4925516 au [CASSCF(6,6)/MRACPF/def2-TZVP(-F)]  
E = -131.3139371 au [CASSCF(6,6)/MRACPF/def2-SVPD]  
E = -131.5430685 au [DLPNO-CCSD(T)/def2-TZVPP]  
ZPE = 0.0400994 au  
G<sub>corr</sub> = 0.0186706 au

|   |                  |                   |                   |
|---|------------------|-------------------|-------------------|
| N | 1.24437866820585 | 0.27251657172752  | -0.20714456370169 |
| H | 1.68846390134938 | 0.69667978298425  | 0.60371941579520  |
| H | 1.67206729865746 | 0.70554163067655  | -1.02209326593829 |
| O | 1.75512517082417 | -1.07761902607584 | -0.22000145156028 |
| H | 0.94962125096314 | -1.60633423931248 | -0.21292392459495 |

**H<sub>3</sub>C-OH** E = -115.539093713354 au  
E = -115.5080329 au [CASSCF(6,6)/MRACPF/def2-TZVP(-F)]  
E = -115.3534743 au [CASSCF(6,6)/MRACPF/def2-SVPD]  
E = -115.5548116 au [DLPNO-CCSD(T)/def2-TZVPP]  
ZPE = 0.0509757 au  
G<sub>corr</sub> = 0.02922996 au

|   |                  |                   |                   |
|---|------------------|-------------------|-------------------|
| O | 1.59594943204642 | -1.05066575113525 | -0.51129554994570 |
| H | 1.09112213666446 | -1.58759038742931 | 0.10752232106756  |
| C | 1.27030531157481 | 0.31653898831653  | -0.29972202631816 |
| H | 1.53371584360337 | 0.65289345081245  | 0.70957520546448  |
| H | 1.85287001522521 | 0.89373059702188  | -1.01666515394851 |
| H | 0.20769577088572 | 0.52035411241369  | -0.47439047631968 |

**1a<sup>N=C</sup><sub>cleav</sub>** E = -262.8340557 au  
E = -262.7578704 au [CASSCF(6,6)/MRACPF/def2-TZVP(-F)]  
E = -262.4094956 au [CASSCF(6,6)/MRACPF/def2-SVPD]  
E = -262.8539453 au [DLPNO-CCSD(T)/def2-TZVPP]  
ZPE = 0.0660651 au  
G<sub>corr</sub> = 0.0389637 au

|   |                   |                   |                  |
|---|-------------------|-------------------|------------------|
| C | -1.89165238627027 | 0.85608931554385  | 1.18647562735233 |
| H | -1.27212644096377 | 1.74820391689657  | 1.22999764061995 |
| H | -2.96814467210790 | 0.92673274371733  | 1.27407288636486 |
| C | 0.49751704963069  | -1.52040850074767 | 0.77356180329393 |

|   |                   |                   |                  |
|---|-------------------|-------------------|------------------|
| H | -0.27790472269965 | -2.28689167452705 | 0.74849782020709 |
| N | -1.41844492863294 | -0.30668481035181 | 1.03409835258648 |
| N | 1.74124173641913  | -1.64850302104789 | 0.67695021513021 |
| H | 1.99152871627263  | -2.62596367180310 | 0.56035768124163 |
| O | -0.01788426164792 | -0.26702020768023 | 0.93489919320352 |

**1a<sup>N-O</sup><sub>cleav</sub>** E = -299.8840940 au  
 E = -299.7973161 au [CASSCF(6,6)/MRACPF/def2-TZVP(-F)]  
 E = -299.3921144 au [CASSCF(6,6)/MRACPF/def2-SVPD]  
 E = -299.909716807193 au [DLPNO-CCSD(T)/def2-TZVPP]  
 ZPE = 0.0657479 au  
 G<sub>corr</sub> = 0.0374562 au

|   |                   |                   |                  |
|---|-------------------|-------------------|------------------|
| C | -1.72391026450479 | -0.30921056415999 | 2.47269817377589 |
| H | -2.70263113583619 | -0.19318171466770 | 2.92966362566438 |
| N | -1.14142887861577 | 0.54556557641560  | 1.74801444256316 |
| N | -1.98994048514265 | -2.43262148220214 | 3.28860123786815 |
| H | -2.02085446718917 | -3.17532271159041 | 2.59284554866302 |
| H | -1.47597712491998 | -2.80287196537118 | 4.08406704188007 |
| O | -1.93044092420207 | 1.71370936774331  | 1.64893714988949 |
| H | -1.39674854892092 | 2.27008439709863  | 1.07169279476220 |
| O | -1.07441591066845 | -1.47353473326612 | 2.72690399493365 |

**1a<sup>N-O</sup><sub>cleav</sub>** E = -283.8921073 au  
 E = -283.8133532 au [CASSCF(6,6)/MRACPF/def2-TZVP(-F)]  
 E = -283.4330776 au [CASSCF(6,6)/MRACPF/def2-SVPD]  
 E = -283.9237826 au [DLPNO-CCSD(T)/def2-TZVPP]  
 ZPE = 0.07680458 au  
 G<sub>corr</sub> = 0.04856208 au

|   |                   |                   |                   |
|---|-------------------|-------------------|-------------------|
| C | -2.08423223513640 | 3.12049130094136  | -1.26293270403419 |
| H | -1.98685495899169 | 3.39128894640082  | -0.20859120677925 |
| H | -1.57187072218393 | 3.86504556782725  | -1.87758322508388 |
| H | -3.13693594090712 | 3.07215388938139  | -1.53895333268649 |
| O | -1.56998053737580 | 1.81957741175263  | -1.50328729976599 |
| O | 1.59702517546055  | 0.45539219773059  | -1.11419569391190 |
| H | 1.83324826853673  | -0.44487483903566 | -1.35925950876978 |
| C | 0.29044434970944  | 0.66701186170009  | -1.39578731405272 |
| H | -0.28330244385688 | -0.15684967026606 | -1.81868104875955 |
| N | -0.20801882525490 | 1.80348676356758  | -1.15559146615625 |
